# Supplementary material for: Climate Change and Mass Extinction Risk in an Endemic-Rich Late Devonian Fauna
Source: Research Square preprint supplement (doi:10.21203/rs.3.rs-622347/v1), 2021-06-22
Supplement: Supplementary file 1 [file dc2b7cda6777f4a76a400707.docx]

**Supplementary Information**

**
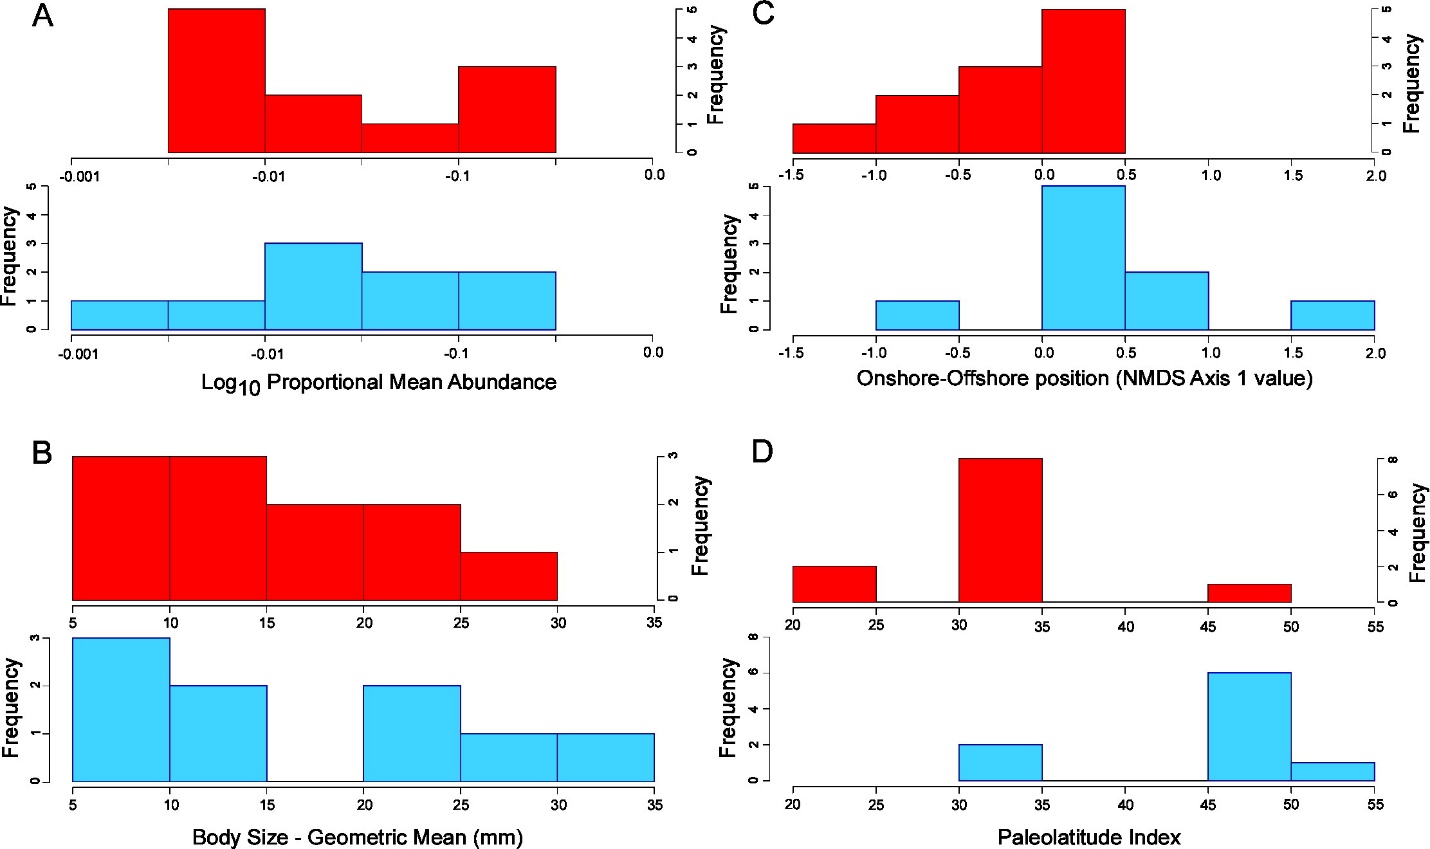
**

Figure S1. Univariate distributions of the four predictor variables for victims (red) and survivors (blue) of the first extinction pulse. A. Mean relative abundance, on a log scale. B. Body size (geometric mean of length and width). C. Mean NMDS 1 value (onshore – offshore position). D. Paleolatitude index.

**
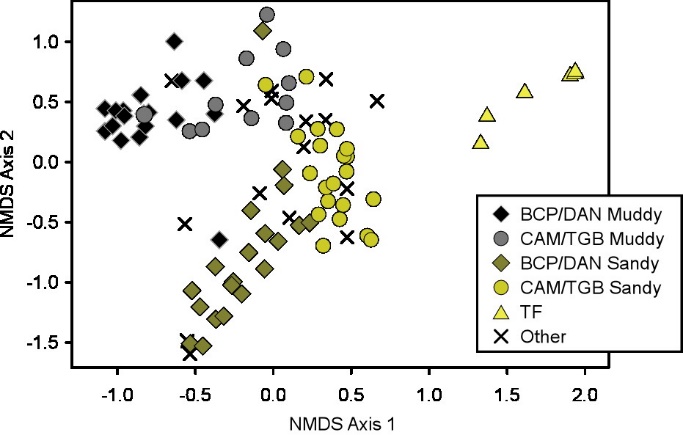
**

Figure S2. Unrotated NMDS results (see Methods).

Table S1. Latitude and longitude of sampling locations. Names are only given for measured sections.

| Locality | Latitude | Longitude | Section Name |
| --- | --- | --- | --- |
| **ADR** | N 42˚15.430' | W 77˚32.156' |  |
| **BCP** | N 42˚21.810' | W 77˚38.675' | Big Creek |
| **BPH** | N 42˚04.394' | W 77˚17.953' |  |
| **CAM** | N 42˚12.008' | W 77˚26.219' | Cameron |
| **CCC** | N 41˚46.643' | W 77˚03.237' |  |
| **CML 1** | N 42˚10.275' | W 77˚21.697' |  |
| **DAN** | N 42˚29.615' | W 77˚39.920' | Dansville |
| **HAN** | N 42˚15.378' | W 77˚29.957' |  |
| **HNS** | N 42˚17.649' | W 77˚38.678' |  |
| **MFT** | N 41˚48.607' | W 77˚04.369' |  |
| **NCL** | N 41˚59.258' | W 77˚10.326' |  |
| **NYP** | N 42˚00.417' | W 77˚07.800' |  |
| **PUP** | N 41˚57.769' | W 77˚07.254' |  |
| **SCL** | N 41˚58.896' | W 77˚08.951' |  |
| **TF** | N 41˚48.728' | W 76˚30.133' |  |
| **TGB** | N 41˚54.423' | W 77˚09.715' | Tioga, Rt. 287 |
| **WAL** | N 42°32.294′ | W 79°10.133′ | Walnut Creek |
| **WCR** | N 42˚00.670' | W 77˚08.248' |  |
| **WSC** | N 42°30.280′ | W 78°05.014′ | Wiscoy Creek |

Table S2. Mo concentrations from the Pipe Creek Formation (first extinction pulse).

| Locality | Sample ID | Mo (ppm) | Source | Method |
| --- | --- | --- | --- | --- |
| **WSC** | Wisc_PC_100 | 0 | this study | XRF |
| **WSC** | Wisc_PC_40 | 0 | this study | XRF |
| **WSC** | Wisc_PC_0-10 | 5.41 | this study | XRF |
| **WSC** | Wisc_PC_70 | 8.78 | this study | XRF |
| **WSC** | Wisc_PC_180 | 5.02 | this study | XRF |
| **WSC** | Wisc_PC_240 | 0 | this study | XRF |
| **WSC** | Wisc_PC_310 | 5.89 | this study | XRF |
| **TF** | TF_23 | 0 | this study | XRF |
| **TF** | TF_22 | 0 | this study | XRF |
| **TF** | TF_21 | 0 | this study | XRF |
| **TF** | TF_20 | 0 | this study | XRF |
| **TF** | TF_19 | 0 | this study | XRF |
| **TF** | TF_18 | 0 | this study | XRF |
| **TF** | TF_17 | 0 | this study | XRF |
| **TF** | TF_16 | 0 | this study | XRF |
| **TF** | TF_15 | 0 | this study | XRF |
| **TF** | TF_14 | 0 | this study | XRF |
| **TF** | TF_13 | 0 | this study | XRF |
| **TF** | TF_12 | 0 | this study | XRF |
| **TF** | TF_11 | 0 | this study | XRF |
| **TF** | TF_10 | 0 | this study | XRF |
| **TF** | TF_9 | 3.6 | this study | XRF |
| **TF** | TF_8_ | 0 | this study | XRF |
| **TF** | TF_7 | 3.78 | this study | XRF |
| **TF** | TF_6_ | 0 | this study | XRF |
| **TF** | TF_5 | 0 | this study | XRF |
| **TF** | TF_4 | 0 | this study | XRF |
| **TF** | TF_3 | 0 | this study | XRF |
| **TF** | TF_2 | 0 | this study | XRF |
| **TF** | TF_1 | 0 | this study | XRF |
| **CAM** | CAM_60 | 0 | this study | XRF |
| **CAM** | CAM_61 | 3.14 | this study | XRF |
| **CAM** | CAM_63 | 0 | this study | XRF |
| **CAM** | CAM_64 | 0 | this study | XRF |
| **CAM** | CAM_67 | 0 | this study | XRF |
| **CAM** | CAM_68 | 0 | this study | XRF |
| **CAM** | CAM_69 | 0 | this study | XRF |
| **CAM** | CAM_70 | 0 | this study | XRF |
| **CAM** | CAM_71 | 0 | this study | XRF |
| **BCP** | BCP_PC_1 | 7.71 | this study | XRF |
| **BCP** | BCP_PC_2 | 0 | this study | XRF |
| **BCP** | BCP_PC_3 | 0 | this study | XRF |
| **BCP** | BCP_PC_4 | 0 | this study | XRF |
| **BCP** | BCP_PC_5 | 0 | this study | XRF |
| **BCP** | BCP_PC_6 | 0 | this study | XRF |
| **BCP** | BCP_PC_7 | 0 | this study | XRF |
| **BCP** | BCP_PC_8 | 0 | this study | XRF |
| **TGB** | A_15 | 0 | this study | XRF |
| **TGB** | A_16 | 0 | this study | XRF |
| **TGB** | A_17 | 0 | this study | XRF |
| **TGB** | A_18 | 0 | this study | XRF |
| **TGB** | A_19 | 0 | this study | XRF |
| **TGB** | A_20 | 0 | this study | XRF |
| **TGB** | A_21 | 0 | this study | XRF |
| **TGB** | TGB_15 | 3.74 | this study | XRF |
| **TGB** | TGB_15 | 2.95 | this study | XRF |
| **TGB** | A_22 | 0 | this study | XRF |
| **TGB** | A_23 | 0 | this study | XRF |
| **TGB** | A_24 | 0 | this study | XRF |
| **TGB** | A_25 | 0 | this study | XRF |
| **TGB** | A_26 | 0 | this study | XRF |
| **WAL** | - | 4 | Lash (2017) | XRF |
| **WAL** | - | 15 | Lash (2017) | XRF |
| **WAL** | - | 26 | Lash (2017) | XRF |
| **WAL** | - | 27 | Lash (2017) | XRF |
| **WAL** | - | 33 | Lash (2017) | XRF |
| **WAL** | - | 19 | Lash (2017) | XRF |
| **WAL** | - | 13 | Lash (2017) | XRF |
| **WAL** | - | 12 | Lash (2017) | XRF |
| **WAL** | - | 13 | Lash (2017) | XRF |
| **WAL** | - | 15 | Lash (2017) | XRF |
| **WAL** | - | 17 | Lash (2017) | XRF |
| **WAL** | - | 13 | Lash (2017) | XRF |
| **WAL** | - | 15 | Lash (2017) | XRF |
| **WAL** | - | 14 | Lash (2017) | XRF |
| **WAL** | - | 13 | Lash (2017) | XRF |
| **WAL** | - | 12 | Lash (2017) | XRF |
| **WAL** | - | 11 | Lash (2017) | XRF |
| **WAL** | - | 10 | Lash (2017) | XRF |
| **WAL** | - | 9 | Lash (2017) | XRF |
| **WAL** | - | 5 | Lash (2017) | XRF |
| **WAL** | - | 4 | Lash (2017) | XRF |
| **WAL** | - | 3 | Lash (2017) | XRF |
| **WAL** | WCLK_66 | 86.2 | Kelly et al. (2019) | ICP-MS |
| **WAL** | WCLK_58 | 54.9 | Kelly et al. (2019) | ICP-MS |
| **WAL** | WCLK_53 | 61.7 | Kelly et al. (2019) | ICP-MS |
| **BCP** | BCLK_2.0 | 2.3 | Kelly et al. (2019) | ICP-MS |
| **BCP** | BCLK_1.0 | 1.8 | Kelly et al. (2019) | ICP-MS |
| **BCP** | BCLK_0.0 | 2.9 | Kelly et al. (2019) | ICP-MS |

Table S3. Values for each species incorporated into the regression analysis. Several species were excluded from the regression analysis due to small sample size or poor preservation (see Methods). Species abbreviations listed in Table S4.

| Species | Extinct | Occurs at Lower Latitude | Thermal Tolerance  (Composite Metric) | Proportion of Total Specimens | Per Sample Mean Proportion | Log10(Per Sample Mean Proportion) | Latitude | Mean Depth | Body Size |
| --- | --- | --- | --- | --- | --- | --- | --- | --- | --- |
| **S.infera** | 1 | 0 | -2.12577 | 0.163494 | 0.158085 | -0.80111 | 30.51 | -1.21154 | 8.478969 |
| **S.impressa** | 0 | 1 | 0.001156 | 0.016513 | 0.014633 | -1.83467 | 30.51 | -0.9052 | 20.71725 |
| **S.amanaensis** | 1 | 0 | -2.12577 | 0.038069 | 0.046598 | -1.33163 | 30.51 | -0.65594 | 16.19667 |
| **S.trulla** | 1 | 0 | -3.00804 | 0.007059 | 0.005842 | -2.23346 | 22.24 | -0.57584 | 23.89525 |
| **D.arcuata** | 1 | 0 | -2.23121 | 0.108282 | 0.129648 | -0.88723 | 30.51 | -0.43943 | 10.76468 |
| **Schizophoria.sp.A** | 1 | 0 | -2.12577 | 0.006177 | 0.008746 | -2.05817 | 30.51 | -0.43912 | 7.043796 |
| **D.cayuta** | 1 | 1 | -0.10428 | 0.018278 | 0.02385 | -1.62251 | 30.51 | -0.40468 | 13.95922 |
| **W.hirsuta** | 0 | 1 | 1.886462 | 0.067314 | 0.101234 | -0.99467 | 51.27 | 0.116644 | 13.12367 |
| **A.gregaria** | 0 | 1 | 1.457492 | 0.306189 | 0.152166 | -0.81768 | 46.19 | 0.135137 | 5.939594 |
| **C.contractum** | 0 | 1 | 1.626917 | 0.005042 | 0.00743 | -2.12898 | 47.3 | 0.178403 | 9.525285 |
| **T.mesacostalis** | 0 | 1 | 1.457492 | 0.001387 | 0.001501 | -2.82355 | 46.19 | 0.18337 | 11.65413 |
| **N.nervosa** | 1 | 1 | -0.10428 | 0.002773 | 0.005087 | -2.29352 | 30.51 | 0.238159 | 26.36702 |
| **R.orestes** | 1 | 0 | -0.66943 | 0.004916 | 0.009219 | -2.0353 | 46.19 | 0.302326 | 12.09384 |
| **C.hamiltonensis** | 1 | 1 | 0.056129 | 0.00416 | 0.005989 | -2.22263 | 31.95 | 0.343256 | 7.849426 |
| **S.hystrix** | 1 | 1 | -0.88112 | 0.083827 | 0.127021 | -0.89613 | 22.24 | 0.34489 | 17.93921 |
| **C.chemungensis** | 0 | 1 | 1.457492 | 0.011093 | 0.015449 | -1.8111 | 46.19 | 0.47785 | 32.86393 |
| **S.coelata** | 1 | 1 | -0.10428 | 0.014875 | 0.021132 | -1.67506 | 30.51 | 0.479603 | 22.54544 |
| **C.inermis** | 0 | 1 | 1.430456 | 0.030505 | 0.046858 | -1.32922 | 46.19 | 0.575073 | 28.94411 |
| **F.chemungensis** | 0 | 1 | 2.47945 | 0.014244 | 0.021782 | -1.6619 | 30.51 | 0.701885 | 22.54111 |
| **C.eximium** | 0 | 1 | 1.626917 | 0.078407 | 0.060727 | -1.21662 | 47.3 | 1.871847 | 7.464097 |

Table S4. Brachiopod species and abbreviations.

| Abbreviation | Species | Order |
| --- | --- | --- |
| *D .arcuata* | *Douvillina arcuata* | Strophomenida |
| *D. cayuta* | *Douvillina cayuta* | Strophomenida |
| *S. coelata* | *Strophonelloides coelata* | Strophomenida |
| *N. nervosa* | *Nervostrophia nervosa* | Strophomenida |
| Chonetid | Chonetid species | Productida |
| *D. walcotti* | *Devonoproductus walcotti* | Productida |
| *W. hirsuta* | *Whidbornella hirsuta* | Productida |
| *F. chemungensis* | *Floweria chemungensis* | Orthotedida |
| *S. infera* | *Stainbrookia infera* | Orthida |
| *S. impressa* | *Schizophoria impressa* | Orthida |
| *S. amanaensis* | *Schizophoria amanaensis* | Orthida |
| *S*. sp. A | *Schizophoria* species A | Orthida |
| *C. contractum* | *Cupularostrum contractum* | Rhynchonellida |
| *C. mesacostalis* | *Camarotoechia mesacostalis* | Rhynchonellida |
| *C. eximia* | *Cupularostrum eximia* | Rhynchonellida |
| *S. hystrix* | *Spinatrypa hystrix* | Atrypida |
| *S. trulla* | *Spinatrypa trulla* | Atrypida |
| *P. devoniana* | *Pseudoatrypa devoniana* | Atrypida |
| *A. angelica* | *“Athyris” angelica* | Athyridida |
| *C. inermis* | *Cyrtospirifer inermis* | Spiriferida |
| *C. chemungensis* | *Cyrtospirifer chemungensis* | Spiriferida |
| *R. orestes* | *Rigauxia orestes* | Spiriferida |
| *T. mesacostalis* | *Tylothyris mesacostalis* | Spiriferida |
| *A. gregaria* | *Ambocoelia gregaria* | Spiriferida |
| *C. hamiltonensis* | *Cyrtina hamiltonensis* | Spiriferinidida |
| *P. speciosa* | *Praewaagenoconcha speciosa* | Productida |
| *P. stigmata* | *“Productella” stigmata* | Productida |
| *P. lachrymosa* | *Praewaagenoconcha speciosa* | Productida |
| *S. onustus* | *Semiproductus onustus* | Productida |
| *P. rectispina* | *“Productella” rectispina* | Productida |
| *D. allegania* | *“Dalmanella” allegania* | Orthida |
| *T. leonensis* | *“Thiemella” leonensis* | Orthida |
| *S. planosulcata* | *Spinatrypa planosulcata* | Atrypida |
| *E. multicostata* | *Eumetabolatoechia multicostata* | Rhynchonellida |
| *J. duplicatus* | *Jacoburbirostrum duplicatus* | Rhynchonellida |

Table S5. Summary of univariate tests comparing victims and survivors of the first extinction pulse for each parameter separately. Mann Whitney tests were applied to all parameters, except for ‘Occurs at Lower Latitude’ for which the Fisher Test was applied. Asterisk marks significant results (*p* < 0.05).

| Parameter | Paleoatitude | Body Size | Mean Depth | Sample Mean | Occurs at Lower Latitude |
| --- | --- | --- | --- | --- | --- |
| **W** | 13 | 47 | 31 | 46 |  |
| **p-value** | 0.004* | 0.882 | 0.175 | 0.824 | 0.038* |

Table S6. Paleobiology Database collection numbers used in Figure 2B.

590, 591, 592, 593, 594, 595, 596, 597, 598, 599, 600, 601, 602, 603, 604, 605, 606, 607, 608, 609, 610, 611, 612, 613, 614, 615, 616, 618, 619, 620, 621, 622, 623, 624, 625, 626, 627, 629, 630, 631, 632, 633, 634, 635, 636, 641, 642, 643, 644, 645, 646, 647, 648, 650, 651, 652, 653, 654, 655, 656, 657, 658, 659, 660, 661, 662, 663, 664, 665, 666, 667, 668, 669, 670, 2775, 2777, 3102, 3374, 3375, 3376, 3378, 3379, 3380, 3381, 3382, 3383, 3396, 3397, 3398, 3399, 3400, 3401, 3402, 3403, 3404, 3405, 3406, 3407, 3408, 3409, 3410, 3411, 3412, 3413, 3414, 3415, 3416, 3417, 3418, 3419, 3420, 3421, 3422, 3423, 3424, 3425, 3426, 3427, 3428, 3429, 3430, 3431, 3432, 3433, 3434, 3437, 3438, 3439, 3440, 3441, 3442, 3443, 3444, 3445, 3446, 3447, 3448, 3449, 3451, 3452, 3454, 3455, 3456, 3457, 3458, 3460, 3476, 3477, 3478, 3480, 3483, 3484, 3485, 3486, 3558, 3560, 3559, 3615, 3619, 3623, 3625, 3633, 3634, 3635, 3636, 3639, 3643, 3660, 3664, 3665, 3672, 3674, 3701, 3703, 3729, 3733, 3738, 3739, 3741, 3743, 3745, 3748, 3749, 3750, 3751, 3798, 3800, 3802, 3804, 3806, 3809, 3810, 3844, 3845, 3846, 3847, 3848, 3849, 3850, 3852, 3853, 3854, 3921, 3922, 3925, 3932, 3933, 3934, 3935, 3936, 3937, 3938, 3939, 3940, 3941, 3942, 3948, 3949, 3961, 3962, 3963, 3964, 3966, 3967, 3968, 3970, 3978, 3979, 3980, 3981, 3984, 3985, 3986, 3987, 3989, 3990, 3991, 3992, 3993, 3995, 3996, 3997, 3998, 3999, 4000, 4002, 4003, 4004, 4007, 4009, 4011, 4012, 4013, 4014, 4015, 4016, 4017, 4018, 4019, 4020, 4021, 4023, 4024, 4026, 4029, 4031, 4032, 4034, 4035, 4036, 4037, 4038, 4039, 4041, 4046, 4049, 4053, 4057, 4692, 4693, 4694, 4696, 4701, 4703, 4705, 4707, 4790, 4791, 4792, 4794, 4796, 4801, 4803, 4804, 4805, 4809, 4810, 4811, 4812, 4813, 4814, 4815, 4816, 4818, 4819, 4820, 4822, 4824, 4825, 4826, 4827, 4828, 4829, 4832, 4833, 4834, 4836, 4837, 4839, 4840, 4843, 4847, 4862, 4863, 4864, 4865, 5198, 5285, 5287, 5288, 5289, 5290, 5291, 5292, 5293, 5294, 5295, 5296, 5297, 5298, 5299, 5300, 5301, 5302, 5303, 5304, 5305, 5306, 5307, 5308, 5309, 5310, 5313, 5314, 5315, 5317, 5319, 5619, 5620, 5657, 5661, 5664, 5665, 5666, 5667, 5668, 5669, 5670, 5671, 5702, 5706, 5707, 5708, 5709, 5767, 5769, 5770, 5772, 5773, 5774, 5775, 5778, 5783, 5792, 5799, 5800, 5802, 5803, 5804, 5806, 5807, 5809, 5815, 5816, 5817, 5818, 5819, 5865, 5928, 5925, 5926, 5927, 5959, 5960, 6018, 6019, 6020, 6021, 6022, 6026, 6027, 6028, 6029, 6030, 6031, 6032, 6033, 6034, 6035, 6036, 6037, 6038, 6040, 6039, 6042, 6041, 6043, 6048, 6049, 6050, 6051, 6054, 6055, 6056, 6057, 6058, 6059, 6060, 6061, 6073, 6078, 6079, 6080, 6081, 6083, 6084, 6085, 6086, 6088, 6089, 6090, 6091, 6092, 6093, 6094, 6095, 6096, 6097, 6098, 6099, 6100, 6102, 6103, 6104, 6106, 6107, 6108, 6109, 6110, 6111, 6112, 6113, 6114, 6115, 6116, 6117, 6161, 6168, 6178, 6180, 6181, 6182, 6184, 6187, 6188, 6189, 6190, 6191, 6193, 6195, 6196, 6197, 6242, 6243, 6244, 6245, 6246, 6247, 6248, 6249, 6250, 6251, 6252, 6253, 6718, 6719, 6720, 6721, 6722, 6723, 6724, 6725, 6726, 6727, 6728, 6729, 6856, 6857, 6858, 6859, 6860, 6861, 6862, 6863, 6865, 6867, 6873, 6874, 6875, 6876, 6972, 6975, 6977, 6979, 6982, 6983, 6985, 6993, 6994, 7038, 7039, 7040, 7117, 7132, 7169, 7170, 7171, 7172, 7173, 7174, 7175, 7176, 7192, 7196, 7203, 7209, 7211, 7212, 7217, 7218, 7219, 7220, 7222, 7223, 7224, 7225, 7226, 7227, 7228, 7229, 7230, 7231, 7232, 7233, 7234, 7235, 7236, 7237, 7238, 7239, 7240, 7241, 7242, 7243, 7244, 7245, 7246, 7247, 7248, 7249, 7301, 7302, 7303, 7304, 7305, 7306, 7307, 7308, 7309, 7310, 8026, 8344, 8345, 8346, 8347, 8348, 8349, 8350, 8351, 8352, 8353, 8354, 8355, 8356, 8357, 8358, 8359, 8360, 8361, 8362, 8372, 8374, 8375, 8376, 8377, 8378, 8379, 8380, 8381, 8410, 8411, 8412, 8413, 8414, 8415, 8416, 8417, 8418, 8419, 8420, 8477, 8478, 8479, 8480, 8481, 8482, 8483, 8484, 8485, 8486, 8487, 8488, 8489, 8491, 8494, 8495, 8496, 8497, 8498, 8499, 8500, 8501, 8502, 8503, 8504, 8505, 8506, 8507, 8508, 8711, 8713, 8714, 8715, 8716, 8717, 8718, 8722, 8723, 8724, 8725, 8726, 8727, 8728, 8729, 8732, 8734, 8735, 8736, 8737, 8739, 8740, 8741, 8742, 8750, 8752, 8753, 8754, 8755, 8756, 8757, 8758, 8759, 8760, 8764, 8765, 8766, 8767, 8768, 8769, 8770, 8771, 8772, 8779, 8780, 8786, 8787, 8788, 8789, 8790, 8791, 8792, 8793, 8794, 8795, 8796, 8797, 8798, 8799, 8808, 8809, 8810, 8811, 8812, 8813, 8814, 8815, 8816, 8817, 8818, 8819, 8820, 8821, 8822, 8823, 8824, 8825, 8826, 8827, 8828, 8829, 8830, 8831, 8832, 8833, 8915, 8916, 8917, 8918, 8919, 8920, 8924, 8925, 8926, 8927, 8928, 8929, 8930, 8931, 8932, 8959, 8960, 8961, 8962, 8963, 8964, 8965, 8966, 8967, 8968, 8969, 8970, 8971, 8972, 8973, 8978, 8979, 8980, 8981, 8982, 8983, 8984, 8985, 8986, 8987, 8988, 8989, 8990, 8991, 8992, 8993, 8994, 8995, 8996, 8997, 8998, 8999, 9000, 9001, 9002, 9003, 9004, 9005, 9006, 9007, 9014, 9015, 9016, 9017, 9018, 9019, 9020, 9027, 9028, 9029, 9352, 9353, 9354, 9355, 9356, 9357, 9358, 9359, 9360, 9361, 9362, 9363, 9364, 9365, 9366, 9367, 9368, 9369, 9370, 9371, 9372, 9373, 9374, 9375, 9376, 9377, 9378, 9379, 9380, 9381, 9382, 9383, 9395, 9396, 9397, 9398, 9399, 9400, 9401, 9402, 9403, 9404, 9405, 9406, 9407, 9408, 9409, 9470, 9471, 9476, 9478, 9479, 9480, 9487, 9488, 9489, 9498, 9500, 9501, 9502, 9503, 9504, 9505, 9506, 9507, 9508, 9509, 9510, 9511, 9512, 9518, 9522, 9523, 9524, 9526, 9537, 9538, 9539, 9540, 9541, 9542, 9543, 9544, 9545, 9546, 9547, 9548, 9549, 9550, 9551, 9552, 9553, 9554, 9555, 9556, 9557, 9558, 9559, 9560, 9561, 9562, 9563, 9564, 9565, 9566, 9567, 9568, 9569, 9570, 9571, 9572, 9573, 9574, 9575, 9576, 9577, 9578, 9579, 9580, 9581, 9582, 9583, 9584, 9513, 9595, 9596, 9597, 9598, 9599, 9600, 9601, 9602, 9603, 9604, 9605, 9606, 9607, 9608, 9609, 9610, 9611, 9612, 9613, 9614, 9615, 9616, 9617, 9657, 9658, 9659, 9660, 9661, 9662, 9663, 9664, 9665, 9667, 9670, 9674, 9675, 9704, 9705, 9706, 9707, 9708, 9882, 9883, 9884, 9885, 9886, 9887, 9888, 9893, 9895, 9896, 9897, 9898, 9899, 9901, 9902, 9903, 9904, 9905, 9906, 9907, 9908, 9909, 9910, 9911, 9912, 9913, 9914, 9915, 9916, 9922, 9923, 9924, 9925, 9926, 9927, 9957, 9991, 10099, 10101, 10107, 10108, 10109, 10110, 10119, 10124, 10127, 10131, 10133, 10134, 10136, 10140, 10144, 10145, 10146, 10148, 10149, 10150, 10151, 10153, 10154, 10155, 10156, 10202, 10203, 10204, 10205, 10206, 10207, 10208, 10209, 10211, 10212, 10213, 10214, 10215, 10216, 10217, 10218, 10219, 10220, 10221, 10223, 10224, 10225, 10226, 10227, 10228, 10229, 10231, 10232, 10233, 10234, 10235, 10236, 10237, 10238, 10288, 10289, 10290, 10291, 10292, 10293, 10294, 10295, 10296, 10297, 10298, 10299, 10300, 10301, 10302, 10303, 10304, 10305, 10307, 10308, 10309, 10310, 10311, 10313, 10315, 10316, 10317, 10318, 10319, 10320, 10321, 10322, 10323, 10324, 10325, 10326, 10327, 10328, 10329, 10331, 10332, 10333, 10334, 10335, 10336, 10337, 10281, 10314, 10372, 10381, 10382, 10383, 10384, 10385, 10387, 10394, 10395, 10396, 10398, 10400, 10401, 10402, 10403, 10404, 10406, 10407, 10408, 10409, 10410, 10411, 10412, 10413, 10414, 10415, 10416, 10417, 10418, 10419, 10420, 10422, 10424, 10426, 10427, 10434, 10436, 10437, 10438, 10439, 10440, 10441, 10453, 10458, 10457, 10459, 10461, 10467, 10468, 10469, 10470, 10474, 10518, 10519, 10520, 10523, 10525, 10535, 10536, 10538, 10539, 10540, 10542, 10543, 10544, 10546, 10552, 10553, 10556, 10636, 10895, 11101, 12039, 12040, 12041, 12053, 12068, 12072, 12071, 12083, 12101, 12103, 12104, 12112, 12143, 12144, 12147, 12148, 12183, 12387, 12922, 12923, 12928, 13006, 13007, 13009, 13011, 13019, 12930, 13038, 13039, 13136, 13139, 13140, 13159, 13161, 13162, 13164, 13165, 13167, 13168, 13169, 13170, 13172, 13875, 13876, 13877, 13878, 13881, 13884, 13886, 13887, 13889, 13890, 13891, 13895, 13897, 13922, 13923, 13924, 13925, 13929, 13930, 13931, 13935, 13936, 13938, 13939, 13941, 13942, 13943, 13955, 13959, 13960, 13964, 13965, 13966, 13975, 13979, 13980, 13981, 13982, 13983, 13984, 13985, 13995, 14009, 14010, 14012, 14015, 14025, 14026, 14027, 14042, 14044, 14061, 14116, 14117, 14118, 14119, 14121, 14151, 14152, 14153, 14154, 14155, 14189, 14190, 14199, 14256, 23245, 23361, 23362, 23444, 23446, 23488, 23489, 23576, 23646, 23648, 23671, 23692, 23695, 24015, 24019, 24018, 24254, 24385, 24388, 24392, 24619, 24620, 24623, 24625, 24630, 24632, 24633, 24694, 24695, 24696, 12252, 12257, 24737, 24738, 24739, 24741, 24743, 10378, 24774, 24785, 24795, 24796, 24811, 24813, 24815, 24857, 24870, 24896, 24898, 24900, 24903, 24907, 24910, 24911, 24931, 24932, 24933, 24949, 24955, 24956, 25055, 25063, 25081, 25092, 25099, 25100, 25102, 25112, 25118, 12102, 25273, 25286, 25287, 25288, 25289, 25290, 25291, 25292, 25293, 25330, 25332, 25334, 25335, 25337, 25339, 25340, 25342, 25369, 25364, 25365, 25367, 25368, 25380, 25383, 25384, 25385, 25386, 25388, 25433, 25436, 25439, 25452, 25489, 25495, 25519, 25520, 25521, 25522, 25523, 25524, 25525, 25526, 25527, 25540, 25541, 25542, 25543, 25545, 25546, 25547, 25548, 25549, 25550, 25551, 25556, 25558, 25559, 25560, 25561, 25563, 25562, 25579, 25587, 25596, 25597, 25598, 25599, 25600, 25601, 25602, 25603, 25604, 25623, 25624, 25651, 25695, 25696, 25705, 25706, 25707, 25713, 25714, 25715, 25716, 25717, 25718, 25719, 25720, 25725, 25726, 25727, 25728, 25729, 25730, 25731, 25732, 25737, 25756, 25757, 25758, 25764, 25765, 25766, 25767, 25768, 25769, 25770, 25790, 25791, 25800, 25801, 25802, 25803, 25804, 25805, 25806, 25807, 25809, 25808, 25810, 25812, 25813, 25814, 25817, 25832, 25833, 25834, 25839, 25840, 25841, 25842, 25844, 25845, 25852, 25854, 25866, 25868, 25870, 25871, 25900, 25901, 25902, 25903, 25904, 25907, 25908, 25894, 25895, 25896, 25897, 25898, 25973, 26115, 26116, 26117, 26118, 26119, 26121, 26122, 26123, 26126, 26128, 26130, 26131, 26132, 26135, 26136, 26159, 26161, 26162, 26164, 26165, 26176, 26201, 26203, 26216, 26217, 26218, 26219, 26220, 26221, 26223, 26224, 26225, 26226, 26245, 26247, 26248, 26251, 26252, 26253, 26255, 26257, 26392, 26394, 26396, 26399, 26402, 26404, 26405, 26406, 26409, 26410, 26411, 26412, 26413, 26414, 26415, 26417, 26418, 26421, 26423, 26426, 26427, 26428, 26429, 26432, 26433, 26434, 26435, 26436, 26440, 26441, 26442, 26443, 26457, 26460, 26552, 26462, 26464, 26465, 26466, 26467, 26469, 26471, 26472, 26473, 26477, 26478, 26479, 26480, 26481, 26482, 26483, 26484, 26485, 26486, 26487, 26489, 26490, 26491, 26492, 26493, 26494, 26495, 26496, 26497, 26498, 26499, 26500, 26501, 26502, 26503, 26504, 26505, 26506, 26507, 26561, 26516, 26517, 26518, 26519, 26520, 26521, 26522, 26523, 26524, 26527, 26566, 26528, 26530, 26531, 26532, 26533, 26534, 26535, 26537, 26538, 26539, 26540, 26541, 26542, 26543, 26544, 26545, 26546, 26567, 26568, 26570, 26571, 26572, 26573, 26576, 26578, 26579, 26580, 26581, 26582, 26584, 26585, 26587, 26588, 26589, 26590, 26598, 26599, 26601, 26603, 26604, 26605, 26607, 26608, 26609, 26610, 26611, 26615, 26616, 26617, 26618, 26619, 26623, 26624, 26625, 26640, 26641, 26642, 26643, 26644, 26645, 26646, 26647, 26648, 26649, 26651, 26652, 26653, 26655, 26658, 26659, 26668, 26669, 26670, 26671, 26672, 26673, 26689, 26690, 26694, 26697, 26786, 26828, 26829, 26826, 26830, 26831, 26832, 26833, 26834, 26836, 26838, 26839, 26840, 26841, 26842, 26843, 26844, 26845, 26846, 26847, 26848, 26849, 26850, 26851, 26852, 26870, 26871, 26874, 26892, 26893, 26894, 26895, 26897, 26898, 26899, 26900, 26901, 26902, 26929, 26978, 26981, 26983, 27036, 27051, 27057, 27058, 27059, 27075, 27076, 27166, 27167, 27168, 27169, 27170, 27171, 27172, 27175, 27180, 27181, 27183, 27184, 27186, 27187, 27195, 27201, 27212, 27326, 27333, 27334, 27335, 27348, 27386, 27399, 27401, 27402, 27403, 27420, 27422, 27423, 27456, 27467, 27472, 27476, 27477, 27478, 27473, 27496, 27497, 27498, 27502, 27504, 27505, 27506, 27532, 27533, 27534, 27554, 27555, 27557, 27558, 27559, 27560, 27561, 27556, 27602, 27607, 27608, 27610, 27611, 27614, 27615, 27616, 27619, 27620, 27621, 27633, 27634, 27635, 27636, 27706, 27707, 27708, 27709, 27710, 27712, 27713, 27746, 27747, 27748, 28174, 28247, 28255, 28285, 28317, 28428, 28483, 28549, 21175, 21172, 28768, 28957, 28966, 28969, 29005, 28971, 29292, 32273, 32280, 32470, 32616, 32701, 32702, 32703, 32704, 32705, 32706, 32707, 32708, 32709, 32711, 32712, 32713, 32714, 34831, 34871, 34891, 34889, 34986, 34987, 34988, 34989, 34990, 35384, 35420, 35421, 35422, 35423, 35424, 35477, 35478, 35479, 35480, 35481, 35482, 35483, 35484, 35485, 35486, 35487, 35488, 35489, 35490, 35491, 35492, 35493, 35494, 35495, 35496, 35497, 35498, 35499, 35500, 35501, 35502, 35503, 35532, 35534, 35536, 35541, 35542, 35543, 35544, 35545, 35556, 35557, 35559, 35560, 35561, 35564, 35565, 35566, 35567, 35578, 35581, 35582, 35584, 35587, 35588, 35589, 35590, 35592, 35593, 35594, 35595, 35596, 35597, 35598, 35599, 35600, 35601, 35603, 35604, 35605, 35609, 35610, 35611, 35612, 35613, 35614, 35615, 35616, 35617, 35618, 35619, 35620, 35621, 35622, 35623, 35628, 35629, 35631, 35632, 35633, 35634, 35637, 35638, 35710, 35711, 35712, 35749, 35713, 35714, 35715, 35716, 35717, 35718, 35719, 35720, 35721, 35860, 35861, 35862, 35863, 35864, 35867, 35868, 35869, 35870, 35871, 35872, 35873, 35878, 35879, 35881, 35883, 35884, 35885, 35886, 35887, 35888, 35889, 35890, 35891, 35892, 35893, 35894, 35895, 35896, 35897, 35898, 35899, 35900, 35901, 35902, 35903, 35912, 35913, 35914, 35915, 35975, 35976, 35977, 35978, 35979, 35980, 35981, 35982, 35983, 36012, 36017, 36018, 36020, 36021, 36022, 36023, 36024, 36025, 36026, 36027, 36028, 36029, 36030, 36031, 36032, 36033, 36034, 36035, 36036, 36037, 36038, 36039, 36040, 36041, 36042, 36043, 36044, 36045, 36046, 36047, 36048, 36049, 36050, 36051, 36052, 36053, 36054, 36055, 36056, 36057, 36058, 36059, 36060, 36061, 36062, 36063, 36064, 36065, 36066, 36067, 36068, 36069, 36070, 36071, 36072, 36073, 36075, 36076, 36078, 36079, 36085, 36086, 36087, 36088, 36089, 36090, 36091, 36092, 36093, 36094, 36095, 36096, 36097, 36098, 36099, 36100, 36101, 36102, 36118, 36119, 36120, 36121, 36122, 36123, 36124, 36125, 36127, 36128, 36129, 36131, 36140, 36141, 36142, 36175, 36176, 36177, 36178, 36179, 36180, 36181, 36182, 36183, 36184, 36185, 36186, 36187, 36188, 36189, 36190, 36191, 36192, 36193, 36194, 36195, 36196, 36201, 36200, 36199, 36198, 36197, 36590, 36602, 36603, 36820, 36821, 36822, 36823, 36824, 36825, 36826, 36827, 36835, 36836, 37052, 37053, 37054, 37055, 37056, 37074, 37075, 37076, 37078, 37080, 37081, 37082, 37084, 37086, 37087, 37088, 37090, 37091, 37092, 37093, 37094, 37095, 37097, 37098, 37099, 37100, 37101, 37102, 37103, 37104, 37105, 37106, 37107, 37108, 37110, 37111, 37112, 37113, 37115, 37116, 37117, 37118, 37121, 37126, 37128, 37129, 37134, 37136, 37137, 37138, 37139, 37140, 37141, 37143, 37144, 37145, 37146, 37147, 37155, 37157, 37159, 37160, 37161, 37162, 37163, 37166, 37167, 37168, 37169, 37170, 37171, 37172, 37173, 37174, 37175, 37177, 37178, 38273, 38274, 38275, 38276, 38278, 38284, 38286, 38294, 38295, 38296, 38298, 38299, 38300, 38302, 38304, 38306, 38323, 38324, 38325, 38327, 38329, 38336, 38349, 38350, 38351, 38383, 38384, 38385, 38386, 38388, 38389, 38390, 38391, 38393, 38394, 38395, 38405, 38408, 38422, 38425, 38427, 38428, 38429, 38430, 38431, 38432, 38433, 38434, 38435, 38436, 38437, 38438, 38439, 38440, 38441, 38442, 38443, 38444, 38445, 38450, 38451, 38452, 38453, 38454, 38455, 38456, 38457, 38458, 38459, 38460, 38461, 38462, 38463, 38464, 38465, 38466, 38467, 38468, 38469, 38470, 38471, 38472, 38473, 38474, 38475, 38476, 38608, 38641, 38642, 38673, 38681, 38708, 38709, 38710, 38711, 38714, 38683, 38742, 38684, 38685, 38686, 38687, 38689, 38690, 38691, 38688, 39038, 39042, 39057, 39059, 39163, 39164, 39165, 39169, 39217, 39218, 39234, 39336, 39341, 39631, 39640, 39706, 39707, 39852, 39874, 39875, 39876, 39877, 39878, 39879, 39880, 39884, 39886, 39887, 39888, 39889, 39890, 40012, 40013, 40011, 40014, 40039, 40040, 40041, 40043, 40044, 40045, 40050, 40055, 40058, 40346, 40347, 40348, 40350, 40349, 40351, 40353, 40354, 40399, 40400, 40402, 40403, 40405, 40408, 40418, 40419, 40422, 40424, 40425, 40429, 40431, 40433, 40434, 40435, 40437, 40438, 40444, 40446, 40448, 40498, 40499, 40520, 40521, 40522, 40524, 40525, 40526, 40527, 40529, 40534, 40566, 40567, 40568, 40569, 40574, 40576, 40579, 40580, 40581, 40582, 40583, 40584, 40668, 40661, 40666, 40667, 40697, 40698, 40700, 40701, 40703, 40706, 40708, 40946, 40953, 40955, 40956, 40957, 40958, 40959, 40965, 40966, 40711, 40713, 41053, 41058, 41761, 39394, 43668, 43713, 39397, 43967, 43969, 44122, 44125, 3830, 44130, 44124, 44137, 44176, 44178, 44182, 44183, 44258, 44265, 45302, 45306, 45310, 45789, 45790, 45791, 45793, 45829, 45830, 45831, 45838, 45839, 45840, 45842, 45864, 45989, 45990, 45993, 45994, 45995, 45996, 45997, 45998, 45999, 46001, 46013, 46019, 46022, 46028, 46154, 46580, 46577, 46578, 46579, 47869, 47874, 48851, 49427, 49428, 50031, 50032, 51855, 54237, 54238, 54239, 54240, 14239, 14340, 54241, 54242, 54243, 54244, 54245, 54246, 54247, 54248, 54249, 6257, 6258, 54250, 54251, 54252, 54253, 54254, 54255, 54256, 54257, 54258, 14261, 54259, 54260, 54261, 54262, 54263, 54264, 54265, 54266, 54267, 54268, 54269, 54270, 54271, 54272, 54273, 54274, 9525, 54275, 54276, 54277, 54278, 54279, 54280, 54281, 54282, 54283, 54284, 54285, 54286, 54287, 54288, 54289, 54290, 54291, 54292, 54293, 54294, 54295, 54296, 54297, 54298, 54299, 54300, 54301, 54302, 54303, 54304, 54305, 54306, 54307, 54308, 54309, 54310, 54311, 54312, 54313, 54314, 54315, 54316, 54317, 54318, 54319, 54320, 54321, 54322, 54323, 54324, 54325, 54326, 54327, 54328, 54329, 54330, 54331, 54332, 54333, 54334, 54335, 54336, 54337, 54338, 54339, 54340, 54341, 54342, 54343, 54344, 54345, 54346, 54347, 54348, 54349, 54350, 54351, 54352, 54353, 54354, 54355, 54356, 54357, 54358, 54359, 54360, 54361, 54362, 54363, 54364, 54365, 54366, 54367, 54368, 54369, 54370, 3945, 54371, 54372, 3944, 54373, 54374, 54375, 54376, 54377, 54378, 54379, 54380, 54381, 54382, 54383, 54384, 54385, 54386, 54387, 54388, 54389, 54390, 54391, 54392, 54393, 54394, 54395, 54396, 54397, 54398, 54399, 54400, 54401, 54402, 3946, 54403, 54404, 54405, 54406, 54407, 54408, 54409, 54410, 54411, 54412, 54413, 54414, 54415, 54416, 54417, 54418, 54419, 54420, 54421, 54422, 54423, 54424, 54425, 54426, 54427, 54428, 54429, 54430, 54431, 54432, 54433, 54434, 54435, 54436, 20909, 54437, 14226, 54438, 54439, 54440, 54441, 54442, 54443, 54444, 54445, 54446, 54447, 54448, 54449, 54450, 54451, 54452, 54453, 54454, 54455, 54456, 14236, 54457, 54458, 54459, 54460, 54461, 54462, 54463, 54464, 54465, 54466, 6265, 54467, 54468, 54469, 54470, 54471, 54472, 54473, 54474, 54475, 54476, 54477, 54478, 54479, 54480, 54481, 54482, 54483, 6264, 54484, 54485, 54486, 54487, 54488, 14248, 54489, 54490, 54491, 54492, 54493, 54494, 54495, 54496, 54497, 54498, 54499, 54500, 54501, 54502, 54503, 54504, 54505, 54506, 54507, 54508, 54509, 54510, 54511, 54512, 54513, 54514, 54515, 54516, 54517, 54518, 54519, 54520, 54521, 54522, 54523, 54524, 54525, 54526, 54527, 54528, 54529, 54530, 54531, 54532, 54533, 54534, 54535, 54536, 54537, 54538, 54539, 54540, 3943, 54541, 54542, 54543, 54544, 54545, 54575, 54576, 54577, 54578, 54579, 54580, 54581, 54582, 54583, 54584, 54585, 54586, 54587, 54588, 54589, 54590, 54591, 54592, 54593, 54594, 54595, 54596, 54597, 54598, 54599, 54600, 54601, 54602, 54603, 54604, 54605, 54606, 54607, 54608, 54609, 54610, 54611, 54612, 54613, 54614, 54615, 54616, 54617, 54618, 54619, 54620, 54621, 54622, 54623, 54624, 54625, 54626, 54627, 54628, 54629, 54630, 54631, 54632, 54633, 54634, 54635, 54636, 54637, 54638, 54639, 54640, 54641, 54642, 54643, 54644, 54645, 54646, 54647, 54648, 54649, 54650, 54651, 54652, 54653, 54654, 54655, 54656, 54657, 54658, 54659, 54660, 54661, 54662, 54663, 54574, 54664, 54665, 54666, 54667, 54668, 54669, 54670, 54671, 54672, 54673, 54674, 54675, 54676, 54677, 54678, 54679, 54680, 54681, 54682, 54683, 54684, 54685, 54686, 54687, 54688, 54689, 54690, 54691, 54692, 54693, 54751, 54752, 54753, 54754, 54755, 54756, 54757, 28551, 54758, 54759, 54760, 54761, 54762, 54763, 54764, 54765, 54766, 54767, 54768, 54769, 54770, 54771, 54772, 54773, 54774, 54775, 54776, 54777, 54778, 54779, 54780, 54781, 54782, 54783, 54784, 54785, 54786, 54787, 54788, 54789, 54790, 54791, 54792, 54793, 54794, 54795, 54796, 54797, 54798, 54799, 54800, 54801, 54802, 54803, 54804, 54805, 54806, 54807, 54808, 54809, 54810, 54811, 54812, 54871, 54872, 54873, 54553, 20945, 54874, 54875, 54876, 54712, 54877, 54878, 54879, 54880, 54881, 54882, 14258, 54883, 54726, 54884, 54885, 54855, 54842, 54886, 54887, 54856, 6262, 54888, 54889, 54890, 54891, 54701, 54892, 54893, 54894, 54895, 54896, 54897, 54898, 54899, 54900, 54901, 54857, 54902, 54903, 54904, 54905, 54906, 54907, 54908, 54909, 54910, 54911, 54912, 54913, 54914, 54915, 54916, 54917, 54918, 54919, 54920, 54921, 54922, 54923, 54924, 54925, 54926, 54927, 54928, 54929, 54930, 54931, 54932, 54933, 54934, 54935, 54962, 54963, 54964, 54965, 54731, 54966, 54967, 54968, 54969, 14253, 54702, 54970, 54971, 54972, 54973, 54974, 54975, 54976, 54977, 54978, 54979, 54980, 54981, 54982, 54983, 54984, 54985, 54986, 54987, 54988, 54989, 54990, 54991, 54992, 54993, 54994, 54995, 54996, 54997, 54998, 54999, 55000, 55001, 55002, 55003, 55004, 55005, 55006, 55007, 55008, 55009, 55010, 55011, 55012, 55013, 55014, 54749, 55015, 55016, 55017, 55018, 55019, 55020, 55021, 55022, 55023, 55024, 55025, 55026, 55027, 55028, 55029, 55030, 55031, 55032, 55033, 55034, 55035, 55036, 55037, 55038, 55039, 54832, 55040, 55041, 55042, 55043, 55044, 55045, 55046, 55047, 55048, 55049, 55050, 55051, 54549, 54734, 10330, 55052, 55053, 55054, 55055, 55056, 55057, 55058, 55059, 55060, 55061, 55062, 55063, 55064, 55065, 55066, 55067, 55068, 55069, 55070, 55071, 55072, 55073, 55074, 55075, 55076, 55077, 55078, 55079, 55080, 55081, 55082, 55083, 55084, 55085, 55086, 55087, 55088, 55089, 54843, 55090, 55091, 55092, 55093, 54951, 55094, 55095, 55096, 55097, 55098, 55099, 55100, 55101, 55102, 55103, 14259, 55104, 55105, 55106, 55107, 55108, 54854, 55109, 55110, 55111, 55112, 55113, 55114, 55115, 55116, 55117, 54700, 55118, 54940, 55119, 55120, 55121, 55122, 55123, 54956, 55124, 55125, 55126, 55127, 55128, 55129, 54708, 55130, 55131, 55132, 55133, 55134, 6254, 55135, 55136, 55137, 55138, 55139, 55140, 55141, 55142, 55143, 55144, 55145, 55146, 55147, 55148, 55149, 55150, 55151, 55152, 55153, 55154, 55155, 55156, 55157, 55158, 54724, 55159, 55160, 55161, 55162, 55163, 55164, 55165, 55166, 55167, 54828, 55168, 28967, 55169, 55170, 55171, 55172, 55173, 55174, 55175, 55176, 55177, 55178, 55179, 55180, 55181, 55182, 55183, 55184, 55347, 55467, 55468, 55477, 55478, 55481, 55485, 55491, 55603, 55604, 55606, 55670, 55717, 55761, 56257, 56259, 56258, 56705, 58133, 58135, 58141, 60128, 60132, 60133, 60134, 60135, 60136, 60137, 60138, 60139, 60140, 60141, 60143, 60145, 60146, 60147, 60150, 60154, 60158, 60159, 60160, 60162, 60164, 60167, 60174, 60177, 60180, 60181, 60182, 60183, 60446, 60466, 60467, 61840, 61841, 61962, 61963, 61964, 61965, 61966, 62049, 62051, 62052, 62054, 62057, 62059, 62060, 62073, 62074, 62125, 62126, 62127, 62128, 62129, 62130, 62132, 62134, 62135, 62138, 62141, 62142, 62143, 62144, 62145, 62146, 62147, 62148, 62149, 62150, 62154, 62157, 62158, 62159, 62161, 62162, 62163, 62164, 62185, 62186, 62428, 64063, 64064, 60044, 60043, 64813, 65029, 65027, 65026, 65028, 65075, 65074, 65080, 65400, 65694, 65695, 65696, 65697, 65698, 65762, 65769, 65778, 65794, 65795, 65813, 65816, 65817, 65763, 65764, 65765, 65766, 65768, 65770, 65771, 65774, 65777, 65772, 65832, 65833, 65776, 65831, 65834, 65961, 65962, 65964, 65966, 65968, 65969, 65975, 65976, 65977, 65978, 65979, 65980, 65981, 65982, 65983, 65984, 65999, 66000, 66001, 66002, 66003, 66054, 66055, 66056, 65814, 65829, 65830, 65815, 66151, 67208, 67209, 67210, 67211, 69212, 70109, 70139, 70141, 70142, 70143, 70144, 70146, 70147, 70148, 70149, 70151, 70153, 70154, 70155, 70156, 70157, 70158, 70160, 70161, 70159, 70247, 70265, 70267, 70270, 70275, 70277, 70279, 70293, 70342, 70366, 70373, 70428, 70433, 70439, 70440, 70441, 70442, 70215, 70211, 70066, 70069, 70070, 70243, 70214, 70207, 70229, 70205, 70204, 70071, 70072, 70073, 70198, 70199, 70200, 70230, 70220, 70210, 70216, 70068, 70201, 69926, 70226, 70224, 70231, 70236, 70956, 71423, 74031, 74162, 74300, 74301, 74491, 74492, 74493, 74494, 74661, 74633, 74950, 74951, 74984, 74985, 74994, 74995, 74996, 74997, 75031, 75032, 75045, 75046, 75047, 75048, 75049, 75083, 75095, 75096, 75097, 75117, 75118, 75137, 75171, 75174, 75176, 75184, 75471, 75470, 75469, 75468, 75466, 75570, 75580, 75581, 75582, 75583, 75584, 75585, 75586, 75587, 75628, 75698, 75691, 75693, 75683, 75674, 75694, 75696, 75697, 75685, 75695, 75675, 75686, 75684, 75681, 75713, 75682, 75687, 75714, 75676, 75678, 75673, 75677, 75707, 75704, 75701, 75702, 75679, 75709, 75699, 75711, 75688, 75689, 75700, 75705, 75712, 75896, 75897, 75899, 75902, 75914, 75915, 75916, 75917, 76065, 76070, 76071, 76072, 76097, 76098, 76099, 76100, 76161, 76162, 76163, 76165, 76167, 76242, 76250, 76332, 76333, 76334, 76335, 76339, 76340, 76341, 76342, 76343, 76344, 76345, 76346, 76347, 76348, 76349, 76350, 76351, 76352, 76353, 76354, 76355, 76356, 76357, 76387, 76388, 76389, 76390, 76391, 76392, 76358, 76359, 76360, 76361, 76362, 76363, 76365, 76366, 76367, 76368, 76369, 76370, 76371, 76372, 76373, 76374, 76375, 76376, 76377, 76378, 76379, 76380, 76381, 76382, 76383, 76384, 76385, 76386, 76395, 76396, 76397, 76398, 76399, 76401, 76402, 76405, 76406, 76408, 76411, 76412, 76413, 76414, 76415, 76416, 76417, 76418, 76419, 76420, 76421, 76422, 76423, 76424, 76425, 76426, 76427, 76428, 76429, 76430, 76431, 76432, 76433, 76435, 76436, 76437, 76438, 76439, 76440, 76441, 76443, 76444, 76471, 76554, 76557, 76564, 76565, 76641, 76642, 76663, 76665, 76666, 76667, 76668, 76669, 76670, 76671, 76672, 76673, 76674, 76675, 76676, 76677, 76678, 76679, 76680, 76681, 76682, 76683, 76684, 76686, 76687, 76688, 76689, 76690, 76691, 76692, 76693, 76694, 76695, 76696, 76697, 76698, 76699, 76700, 76701, 76702, 76703, 76704, 76706, 76707, 76717, 76756, 76757, 76764, 76765, 76766, 76767, 76768, 76769, 76770, 76771, 76772, 76773, 76774, 76775, 76776, 76777, 76778, 76779, 76781, 76782, 76783, 76785, 76786, 76787, 76788, 76789, 76790, 76796, 76797, 76798, 76799, 76800, 76802, 76784, 76791, 76792, 76793, 76794, 76795, 76801, 76803, 76818, 76819, 76820, 76821, 76822, 76823, 76814, 76804, 76805, 76806, 76807, 76808, 76809, 76810, 76811, 76812, 76813, 76815, 76816, 76817, 76824, 76825, 76826, 76827, 76828, 76829, 76830, 76831, 76832, 76833, 76834, 76835, 76836, 76837, 76838, 76839, 76840, 76841, 76846, 76847, 76848, 76849, 76850, 76851, 76914, 28047, 76992, 77048, 77049, 77050, 77056, 77076, 77077, 77078, 77079, 77080, 77224, 77223, 77743, 77788, 77872, 77883, 77884, 77885, 77886, 77887, 77888, 77889, 77958, 77959, 77909, 78171, 78403, 78415, 78886, 78916, 78904, 78906, 79093, 79135, 79383, 79549, 79686, 79688, 79690, 79693, 79695, 79712, 79713, 79715, 79716, 80103, 80262, 80272, 80301, 80302, 80303, 80305, 80306, 80471, 80472, 80473, 80474, 80476, 80744, 81022, 81049, 81117, 81118, 81121, 81168, 81169, 81281, 75892, 81602, 81603, 81605, 81606, 81607, 81646, 81647, 81648, 81649, 81652, 81653, 81654, 81655, 81656, 81657, 81658, 81659, 81660, 81661, 81662, 81663, 81665, 81727, 81749, 81750, 81790, 81791, 81792, 81793, 81794, 81795, 81796, 81797, 81802, 81853, 81856, 81857, 82032, 82034, 82073, 82083, 82097, 82106, 82107, 81731, 82483, 82561, 82563, 82564, 82610, 82611, 82658, 82666, 82667, 82685, 82692, 82740, 82743, 82745, 82746, 82748, 82753, 82900, 82907, 82901, 82917, 82920, 82928, 82940, 82959, 82960, 82987, 82988, 83027, 83028, 83030, 83031, 83032, 83033, 83034, 83035, 83077, 83078, 83080, 83084, 83085, 83086, 83087, 83088, 83108, 83109, 83110, 83111, 83112, 83113, 83114, 83115, 83119, 83120, 83220, 83240, 83241, 83244, 83245, 83247, 83248, 83256, 83257, 83260, 83286, 83288, 83289, 83290, 83291, 83298, 83318, 83324, 83326, 83329, 83339, 83340, 83344, 83345, 83782, 83798, 83799, 83892, 83893, 83894, 83895, 83896, 83897, 83898, 83899, 83914, 83915, 83916, 83917, 83918, 83919, 83928, 83973, 83974, 83977, 83978, 83979, 84042, 84083, 84086, 84090, 84091, 84095, 84098, 84099, 84100, 84101, 84253, 81292, 84298, 84302, 84330, 84336, 84375, 84377, 84378, 84380, 84381, 84382, 84383, 84384, 84385, 84386, 84387, 84388, 84470, 84627, 84628, 84630, 84631, 84635, 84638, 84640, 84642, 84645, 84648, 84650, 84660, 84661, 84662, 84663, 84665, 84668, 84669, 84671, 84704, 84706, 84707, 74993, 86229, 86235, 86238, 86252, 86239, 86240, 86241, 86253, 86242, 86243, 86244, 86255, 86254, 86256, 86246, 86245, 86261, 86260, 86247, 86250, 86263, 86264, 86268, 86269, 86267, 86266, 86265, 86248, 86316, 86317, 86318, 86319, 86321, 86322, 86320, 86327, 86326, 86336, 86337, 86338, 86339, 86340, 86385, 86386, 86387, 86635, 86636, 86638, 86640, 86643, 86637, 86641, 86642, 86647, 86649, 86650, 86653, 86645, 86651, 86652, 86644, 86648, 86646, 86654, 86655, 86657, 86656, 86658, 89648, 89675, 89651, 89652, 89653, 89654, 89655, 89657, 89656, 89660, 89659, 89661, 89658, 89662, 89663, 89665, 89664, 89667, 89666, 89669, 89668, 89672, 89673, 89671, 89674, 89670, 89676, 89677, 89684, 89685, 89686, 89688, 89682, 89683, 89680, 89687, 89681, 89690, 89691, 89692, 89694, 89689, 89695, 89696, 89697, 89698, 89699, 89701, 89703, 89702, 89706, 89707, 89708, 89709, 89705, 89704, 89710, 89712, 89711, 89713, 89714, 89726, 89727, 89728, 89716, 89718, 89719, 89720, 89721, 89729, 89730, 89722, 89734, 89732, 89717, 89725, 89731, 89733, 89724, 89737, 89738, 89739, 89740, 89741, 89747, 89750, 89751, 89752, 89753, 89754, 89744, 89742, 89745, 89748, 89749, 89735, 89743, 89736, 89756, 89770, 89757, 89766, 89768, 89769, 89767, 89771, 89755, 89760, 89765, 89758, 89759, 89762, 89772, 89774, 89782, 89775, 89776, 89777, 89778, 89779, 89780, 89781, 89783, 89789, 89790, 89791, 89792, 89793, 89787, 89784, 89785, 89786, 89788, 89794, 89801, 89804, 89812, 89800, 89805, 89807, 89811, 89816, 89818, 89795, 89813, 89817, 89802, 89814, 89815, 89808, 89809, 89810, 89803, 89806, 89819, 89824, 89825, 89826, 89828, 89829, 89831, 89821, 89822, 89823, 89827, 89820, 89715, 89678, 89679, 89693, 89700, 89723, 89746, 89761, 89763, 89764, 89830, 89876, 89877, 89878, 89879, 89880, 89883, 89882, 89884, 89885, 89886, 89887, 89888, 89889, 89893, 89894, 89895, 89891, 89890, 89899, 89907, 89910, 89912, 89913, 89896, 89900, 89902, 89911, 89897, 89898, 89901, 89903, 89904, 89905, 89906, 89914, 89915, 89908, 89909, 89921, 89922, 89927, 89928, 89924, 89925, 89916, 89917, 89919, 89920, 89923, 89926, 89931, 89932, 89933, 89935, 89929, 89930, 89918, 89934, 89941, 89942, 89936, 89937, 89939, 89940, 89938, 89944, 89943, 89945, 89953, 89954, 89964, 89955, 89956, 89965, 89966, 89967, 89968, 89970, 89957, 89958, 89959, 89962, 89963, 89960, 89980, 89981, 89983, 89982, 89984, 89985, 89986, 90440, 90441, 90628, 90841, 90843, 90845, 90847, 90842, 90844, 90848, 90850, 90854, 90855, 90856, 90853, 90849, 90866, 90867, 90928, 90938, 90939, 90951, 90952, 90954, 91091, 91216, 91215, 91217, 91225, 91226, 91227, 91228, 91229, 91230, 91231, 91232, 91233, 91234, 91235, 91236, 91237, 91238, 91239, 91240, 91241, 91242, 91243, 91244, 91245, 91246, 91247, 91248, 91249, 91250, 91267, 91268, 91269, 91270, 91271, 91272, 91273, 91274, 91275, 91276, 91277, 91278, 91279, 91280, 91281, 91431, 92828, 92829, 92830, 92831, 92832, 92833, 92834, 92835, 92843, 92844, 92845, 92846, 92847, 92848, 92881, 92896, 93840, 93841, 93842, 93843, 93844, 93847, 93845, 93846, 93848, 93849, 93850, 94118, 94130, 94131, 94132, 94133, 94134, 94249, 94266, 94271, 94267, 94268, 94269, 94270, 94272, 94273, 94275, 94274, 94276, 94277, 94278, 94402, 94403, 94404, 94405, 94406, 94407, 94408, 94409, 94410, 94411, 94412, 94433, 94432, 94438, 94431, 94430, 94437, 94443, 94440, 94442, 94447, 94446, 94448, 94449, 94450, 94451, 94453, 94452, 94454, 94427, 94429, 94428, 94510, 94511, 94512, 94513, 94514, 94515, 94517, 94521, 94523, 94522, 94524, 94529, 94530, 94531, 94533, 94536, 96209, 96210, 96211, 96212, 96213, 96215, 96216, 96214, 96217, 96218, 96219, 96220, 96293, 96295, 96294, 96299, 96298, 96300, 96304, 96305, 96307, 96306, 96308, 96309, 96310, 96311, 96312, 96313, 96315, 96316, 96320, 96318, 96330, 96331, 96332, 96333, 96334, 96340, 96338, 96339, 96341, 96342, 96343, 96345, 96346, 96356, 96357, 96358, 96363, 96364, 96365, 96344, 96347, 96362, 96360, 96359, 96361, 96366, 96348, 96367, 96371, 96373, 96372, 96381, 96382, 96383, 96385, 96376, 96384, 96377, 96378, 96375, 96374, 96379, 96386, 96387, 96389, 96388, 96418, 96419, 96420, 96421, 96422, 96423, 96424, 96425, 96426, 96427, 96428, 96429, 99470, 49107, 100034, 100292, 101678, 101680, 100985, 100986, 101895, 101009, 104031, 106712, 106713, 106714, 106715, 106716, 106717, 106718, 106719, 106996, 107417, 107419, 107420, 109022, 111330, 111331, 111332, 111345, 111343, 111349, 111415, 111417, 111416, 111421, 111422, 111419, 111420, 111423, 111424, 111425, 111450, 111442, 111443, 111457, 111463, 111468, 111469, 111470, 111467, 111471, 84473, 111612, 111623, 111616, 111615, 111624, 111625, 111627, 111629, 111638, 111640, 111631, 111634, 111635, 111818, 111824, 111827, 111828, 111829, 111830, 111831, 111836, 111837, 111838, 111839, 111840, 111842, 111843, 111832, 111841, 111835, 111834, 111860, 111862, 111889, 111900, 111901, 111903, 111906, 111908, 111909, 111919, 111920, 111947, 111957, 111951, 111952, 111954, 111956, 111949, 111962, 112146, 112155, 112156, 112157, 112158, 112162, 112324, 112326, 112338, 112445, 114973, 114984, 115005, 115003, 115006, 115007, 116468, 121774, 121804, 121807, 127755, 127762, 132154, 132155, 134738, 134802, 134803, 138795, 141642, 144082, 144259, 144264, 144265, 144266, 144911, 144912, 144943, 143798, 144101, 144594, 144653, 144787, 144910, 145664, 145993, 145994, 145995, 145998, 145999, 146001, 146002, 146003, 146007, 146008, 146009, 146017, 150361, 150363, 150360, 150334, 150365, 154361, 154360, 154376, 154377, 156513, 156526, 157914, 159928, 159926, 159981, 159982, 159983, 160068, 160377, 160556, 160622, 160674, 160675, 160676, 160677, 160730, 160731, 160732, 160733, 161255, 161256, 161257, 161475, 162314, 162315, 162317, 164273, 164274, 164275, 164276, 164277, 164278, 164279, 164280, 164281, 3826, 164689, 164691, 164726, 164730, 164731, 164732, 164733, 164734, 164735, 164792, 164793, 164794, 164795, 164796, 164797, 164798, 164799, 164800, 164801, 164802, 164803, 164804, 164805, 164806, 164807, 164814, 164815, 164816, 164817, 164818, 164819, 164820, 164822, 164821, 164823, 164824, 164825, 164826, 164827, 164828, 167784, 169214, 169310, 169311, 170009, 170582, 170583, 170606, 170992, 176103, 176105, 176106, 176109, 176111, 176112, 176113, 176759, 176760, 184019, 184352, 184353, 184355, 184356, 184357, 184358, 184359, 176209, 186486, 188202, 188209, 188934, 188981, 188982, 193694, 197018, 197084, 197085, 197086, 197389, 197390, 197391, 197392, 197393, 197394, 197631, 182837, 200119, 62172, 203874, 85062, 206786, 206787, 206788, 206789, 206790, 206791, 206792, 124082, 111782, 124078, 206793, 206794, 85061, 206795, 39830, 206796, 206818
